# Supplementary material
Source: PubMed Central journal article supplement (PMC3105656)
Supplement: 2010.036558_2.pdf [file 2010.036558_2.pdf]

**Manuscript no. HAEMATOL/2010/036558 entitled**

**“The kinase inhibitor TKI258 is active against the novel CUX1-FGFR1 fusion detected in a patient with T-lymphoblastic leukemia/lymphoma and t(7;8)(q22;p11)“**

**Authors: Bartosz Wasag, Ph.D., Els Lierman, Ph.D., Peter Meeus, M.D., Jan Cools, Ph.D., Peter Vandenberghe, M.D., Ph.D.**

**Information about the contributions of each person named as having participated in the study**

- 1) Guarantor(s)**, i.e., person(s) who is (are) responsible for the integrity of the work as a whole:
- Wasag Bartosz; Department of Biology and Genetics, Medical University of Gdansk, Gdansk, Poland; [bwasag@gumed.edu.pl](mailto:bwasag@gumed.edu.pl)
  - Vandenberghe Peter; Center for Human Genetics, K.U.Leuven, Leuven, Belgium; [Peter.Vandenberghe@uzleuven.be](mailto:Peter.Vandenberghe@uzleuven.be)

According to the International Committee of Medical Journal Editors (ICMJE) ([http://www.icmje.org/ethical\\_1author.html](http://www.icmje.org/ethical_1author.html)): “*Authorship credit should be based on: 1) substantial contributions to conception and design, acquisition of data, or analysis and interpretation of data; 2) drafting the article or revising it critically for important intellectual content; and 3) final approval of the version to be published. Authors should meet conditions 1, 2, and 3 ..... Acquisition of funding, collection of data, or general supervision of the research group alone does not constitute authorship*”.

The guarantors of this manuscript confirm that all persons designated as authors qualify for authorship, and that each author has participated sufficiently in the work to take public responsibility for appropriate portions of the content.

2) Authors who participated in the **conception of the study**: Wasag Bartosz, Meeus Peter and Vandenberghe Peter

3) **Design & Methods**. The following authors were responsible for specific investigations (please detail):

- Wasag Bartosz, Peter Vandenberghe and Jan Cools were responsible for designing the study
- Wasag Bartosz, Lierman Els, Cools Jan and Vandenberghe Peter were responsible for the methods used

4) **Results**. The following authors were responsible for specific portions of the results, including figures and tables (please indicate the person responsible for each figure and each table):

- Wasag Bartosz, Lierman Els, Cools Jan and Vandenberghe Peter were responsible for interpreting the results
- Wasag Bartosz, Lierman Els, Vandenberghe Peter were responsible for Figure 1.
- Wasag Bartosz, Lierman Els, Vandenberghe Peter were responsible for Figure 2 .

5) **Writing the manuscript**. The following authors were responsible for writing the manuscript:

- Wasag Bartosz, Lierman Els, Cools Jan and Vandenberghe Peter were responsible for writing the manuscript

6) **Contributors Listed in Acknowledgments**:

Rubens Monique is thanked for excellent technical support with cytogenetic and FISH analysis.
